# Supplementary material for: Genetic Structure and Evolution of the Leishmania Genus in Africa and Eurasia: What Does MLSA Tell Us
Source: PubMed Central journal article supplement (PMC3681676; doi:10.1371/journal.pntd.0002255), 2013-06-13
Supplement: pntd.0002255.s009.pdf [file pntd.0002255.s009.pdf]

Table S1. Information on the 222 strains used in this study.

| LEM   | WHO code           | MLEE-based taxa      | Country  | Subregion | Zymodeme | Host                        | MLSA-based clusters | Genotype |
|-------|--------------------|----------------------|----------|-----------|----------|-----------------------------|---------------------|----------|
| L0144 | MHOM/ET/72/L100    | <i>L. aethiopica</i> | Ethiopia | E. AF     | MON-14   | <i>Homo sapiens</i>         | Grp_I               | LST0009  |
| L3348 | MHOM/ET/81/921-81  | <i>L. aethiopica</i> | Ethiopia | E. AF     | MON-261  | <i>Homo sapiens</i>         | Grp_I               | LST0009  |
| L3353 | MHOM/ET/82/652-82a | <i>L. aethiopica</i> | Ethiopia | E. AF     | MON-243  | <i>Homo sapiens</i>         | Grp_I               | LST0009  |
| L0145 | MHOM/KE/71/KPS-H2  | <i>L. aethiopica</i> | Kenya    | E. AF     | MON-14   | <i>Homo sapiens</i>         | Grp_I               | LST0020  |
| L0615 | MHOM/ET/82/101-82  | <i>L. aethiopica</i> | Ethiopia | E. AF     | MON-69   | <i>Homo sapiens</i>         | Grp_I               | LST0033  |
| L0618 | MHOM/ET/83/68-83   | <i>L. aethiopica</i> | Ethiopia | E. AF     | MON-70   | <i>Homo sapiens</i>         | Grp_I               | LST0035  |
| L1067 | MHOM/ET/63/L28     | <i>L. aethiopica</i> | Ethiopia | E. AF     | MON-250  | <i>Homo sapiens</i>         | Grp_I               | LST0051  |
| L1118 | MHOM/ET/83/130-83  | <i>L. aethiopica</i> | Ethiopia | E. AF     | MON-239  | <i>Homo sapiens</i>         | Grp_I               | LST0053  |
| L1119 | MHOM/ET/83/103-83  | <i>L. aethiopica</i> | Ethiopia | E. AF     | MON-249  | <i>Homo sapiens</i>         | Grp_I               | LST0054  |
| L1517 | MHOM/ET/89/LEM1517 | <i>L. aethiopica</i> | Ethiopia | E. AF     | MON-241  | <i>Homo sapiens</i>         | Grp_I               | LST0060  |
| L1636 | MHOM/ET/83/85-83   | <i>L. aethiopica</i> | Ethiopia | E. AF     | MON-242  | <i>Homo sapiens</i>         | Grp_I               | LST0063  |
| L1647 | MHOM/ET/72/L127    | <i>L. aethiopica</i> | Ethiopia | E. AF     | MON-247  | <i>Homo sapiens</i>         | Grp_I               | LST0064  |
| L2357 | MHOM/ET/90/DISKO   | <i>L. aethiopica</i> | Ethiopia | E. AF     | MON-251  | <i>Homo sapiens</i>         | Grp_I               | LST0075  |
| L2358 | MHOM/ET/91/KASSAYE | <i>L. aethiopica</i> | Ethiopia | E. AF     | MON-248  | <i>Homo sapiens</i>         | Grp_I               | LST0076  |
| L3351 | MHOM/ET/70/L96     | <i>L. aethiopica</i> | Ethiopia | E. AF     | MON-260  | <i>Homo sapiens</i>         | Grp_I               | LST0095  |
| L3362 | MHOM/ET/82/741-82  | <i>L. aethiopica</i> | Ethiopia | E. AF     | MON-240  | <i>Homo sapiens</i>         | Grp_I               | LST0096  |
| L3363 | MHOM/ET/81/1091-81 | <i>L. aethiopica</i> | Ethiopia | E. AF     | MON-245  | <i>Homo sapiens</i>         | Grp_I               | LST0097  |
| L3364 | MPRV/ET/71/L111    | <i>L. aethiopica</i> | Ethiopia | E. AF     | MON-262  | <i>Procapra habessinica</i> | Grp_I               | LST0098  |
| L0163 | MHOM/TN/80/LEM163  | <i>L. killicki</i>   | Tunisia  | N. AF     | MON-8    | <i>Homo sapiens</i>         | Grp_II              | LST0016  |
| L4018 | MHOM/TN/2000/26LC  | <i>L. killicki</i>   | Tunisia  | N. AF     | MON-8    | <i>Homo sapiens</i>         | Grp_II              | LST0016  |
| L0588 | MHOM/GR/82/SER-L60 | <i>L. tropica</i>    | Greece   | S.E       | MON-57   | <i>Homo sapiens</i>         | Grp_II              | LST0032  |
| L0617 | MHOM/IL/80/SINGER  | <i>L. tropica</i>    | Israel   | M.E       | MON-54   | <i>Homo sapiens</i>         | Grp_II              | LST0034  |
| L0955 | MHOM/YE/86/LEM955  | <i>L. tropica</i>    | Yemen    | M.E       | MON-71   | <i>Homo sapiens</i>         | Grp_II              | LST0045  |
| L1015 | MHOM/YE/86/LEM1015 | <i>L. tropica</i>    | Yemen    | M.E       | MON-71   | <i>Homo sapiens</i>         | Grp_II              | LST0048  |
| L1314 | MHOM/MA/88/LEM1314 | <i>L. tropica</i>    | Morocco  | N. AF     | MON-102  | <i>Homo sapiens</i>         | Grp_II              | LST0057  |
| L1451 | MHOM/MA/88/LEM1451 | <i>L. tropica</i>    | Morocco  | N. AF     | MON-112  | <i>Homo sapiens</i>         | Grp_II              | LST0058  |
| L1452 | MHOM/MA/88/LEM1452 | <i>L. tropica</i>    | Morocco  | N. AF     | MON-107  | <i>Homo sapiens</i>         | Grp_II              | LST0059  |
| L1694 | ISER/MA/89/LEM1694 | <i>L. tropica</i>    | Morocco  | N. AF     | MON-123  | <i>Phlebotomus sergenti</i> | Grp_II              | LST0065  |
| L1824 | MHOM/KE/86/EB103   | <i>L. tropica</i>    | Kenya    | E. AF     | MON-119  | <i>Homo sapiens</i>         | Grp_II              | LST0068  |
| L1828 | ISER/MA/89/LEM1828 | <i>L. tropica</i>    | Morocco  | N. AF     | MON-122  | <i>Phlebotomus sergenti</i> | Grp_II              | LST0069  |
| L1904 | MHOM/GR/88/LA615   | <i>L. tropica</i>    | Greece   | S.E       | MON-114  | <i>Homo sapiens</i>         | Grp_II              | LST0070  |
| L2001 | MHOM/EG/90/LPN65   | <i>L. tropica</i>    | Egypt    | M.E       | MON-137  | <i>Homo sapiens</i>         | Grp_II              | LST0071  |
| L2313 | IGUG/KE/91/000     | <i>L. tropica</i>    | Kenya    | E. AF     | MON-119  | <i>Homo sapiens</i>         | Grp_II              | LST0074  |

|       |                        |                    |              |       |         |                             |         |         |
|-------|------------------------|--------------------|--------------|-------|---------|-----------------------------|---------|---------|
| L2454 | MHOM/KE/92/EB000       | <i>L. tropica</i>  | Kenya        | E. AF | MON-119 | <i>Homo sapiens</i>         | Grp_II  | LST0077 |
| L2869 | MHOM/JO/93/JH67        | <i>L. tropica</i>  | Jordan       | M.E   | MON-200 | <i>Homo sapiens</i>         | Grp_II  | LST0085 |
| L3322 | MHOM/JO/96/JH-88       | <i>L. tropica</i>  | Jordan       | M.E   | MON-265 | <i>Homo sapiens</i>         | Grp_II  | LST0094 |
| L3919 | MHOM/TR/99/LSL43       | <i>L. tropica</i>  | Turkey       | M.E   | MON-ND  | <i>Homo sapiens</i>         | Grp_II  | LST0115 |
| L3956 | MHOM/IL/96/LRC-L691    | <i>L. tropica</i>  | Israel       | M.E   | MON-137 | <i>Homo sapiens</i>         | Grp_II  | LST0118 |
| L3987 | MHOM/TN/2000/000a      | <i>L. killicki</i> | Tunisia      | N. AF | MON-8   | <i>Homo sapiens</i>         | Grp_II  | LST0121 |
| L1108 | MPSA/SA/83/JISH220     | <i>L. arabica</i>  | Saudi Arabia | M.E   | MON-99  | <i>Psammomys</i>            | Grp_III | LST0052 |
| L0423 | MRHO/SU/65/VL          | <i>L. turanica</i> | Turkmenistan | C.A   | MON-21  | <i>Rhombomys opimus</i>     | Grp_IV  | LST0025 |
| L0558 | MRHO/SU/74/95A         | <i>L. turanica</i> | Turkmenistan | C.A   | MON-64  | <i>Rhombomys opimus</i>     | Grp_IV  | LST0030 |
| L0563 | MMEL/SU/79/MEL         | <i>L. turanica</i> | Georgia      | W.A   | MON-65  | <i>Meles meles</i>          | Grp_IV  | LST0031 |
| L3408 | MRHO/SU/87/KD-87527L   | <i>L. turanica</i> | Uzbekistan   | C.A   | MON-271 | <i>Rhombomys opimus</i>     | Grp_IV  | LST0101 |
| L3411 | MRHO/SU/86/KD-86235    | <i>L. turanica</i> | Uzbekistan   | C.A   | MON-270 | <i>Rhombomys opimus</i>     | Grp_IV  | LST0103 |
| L3414 | MRHO/SU/95/T-9551R     | <i>L. turanica</i> | Turkmenistan | C.A   | MON-233 | <i>Rhombomys opimus</i>     | Grp_IV  | LST0104 |
| L3415 | MRHO/MN/86/MNR-14      | <i>L. turanica</i> | Mongolia     | E.A   | MON-234 | <i>Rhombomys opimus</i>     | Grp_IV  | LST0105 |
| L3418 | MRHO/MN/83/MNR-6       | <i>L. turanica</i> | Mongolia     | E.A   | MON-65  | <i>Rhombomys opimus</i>     | Grp_IV  | LST0106 |
| L0452 | MRHO/CN/60/GERBILLI    | <i>L. gerbilli</i> | China        | E.A   | MON-22  | <i>Rhombomys opimus</i>     | Grp_V   | LST0027 |
| L3390 | MRHO/SU/87/E-11        | <i>L. gerbilli</i> | Kazakhstan   | C.A   | MON-272 | <i>Rhombomys opimus</i>     | Grp_V   | LST0099 |
| L3391 | MRHO/SU/95/T-9520      | <i>L. gerbilli</i> | Turkmenistan | C.A   | MON-ND  | <i>Rhombomys opimus</i>     | Grp_V   | LST0100 |
| L3410 | MRHO/SU/87/KD-87542R   | <i>L. gerbilli</i> | Uzbekistan   | C.A   | MON-273 | <i>Rhombomys opimus</i>     | Grp_V   | LST0102 |
| L0133 | MHOM/LY/75/ASHFORD55   | <i>L. major</i>    | Libya        | N. AF | MON-25  | <i>Homo sapiens</i>         | Grp_VI  | LST0002 |
| L0309 | MMER/MA/81/LEM309      | <i>L. major</i>    | Morocco      | N. AF | MON-25  | <i>Meriones shawi</i>       | Grp_VI  | LST0002 |
| L1616 | MHOM/SN/89/CRE9        | <i>L. major</i>    | Senegal      | W.AF  | MON-25  | <i>Homo sapiens</i>         | Grp_VI  | LST0002 |
| L1637 | MHOM/DZ/89/LIPA228     | <i>L. major</i>    | Algeria      | N. AF | MON-25  | <i>Homo sapiens</i>         | Grp_VI  | LST0002 |
| L3536 | MHOM/DZ/98/DPPE26      | <i>L. major</i>    | Algeria      | N. AF | MON-269 | <i>Homo sapiens</i>         | Grp_VI  | LST0002 |
| L4746 | MHOM/TN/2004/LEI21     | <i>L. major</i>    | Tunisia      | N. AF | MON-25  | <i>Homo sapiens</i>         | Grp_VI  | LST0002 |
| L0155 | MHOM/ML/80/LEM155      | <i>L. major</i>    | Mali         | W.AF  | MON-25  | <i>Homo sapiens</i>         | Grp_VI  | LST0005 |
| L2389 | IDUB/ET/90/TESHOME202  | <i>L. major</i>    | Ethiopia     | E. AF | MON-74  | <i>Phlebotomus duboscqi</i> | Grp_VI  | LST0005 |
| L2574 | MHOM/PT/92/CRE26       | <i>L. major</i>    | Portugal     | S.E   | MON-74  | <i>Homo sapiens</i>         | Grp_VI  | LST0005 |
| L4812 | MHOM/00/2004/LEI26     | <i>L. major</i>    | Burkina Faso | W.AF  | MON-26  | <i>Homo sapiens</i>         | Grp_VI  | LST0005 |
| L4935 | MHOM/MR/2005/LPC8      | <i>L. major</i>    | Mauritania   | W.AF  | MON-26  | <i>Homo sapiens</i>         | Grp_VI  | LST0005 |
| L3522 | MHOM/SN/98/LMM1        | <i>L. major</i>    | Senegal      | W.AF  | MON-117 | <i>Homo sapiens</i>         | Grp_VI  | LST0006 |
| L4308 | MHOM/MR/2001/CRE118    | <i>L. major</i>    | Mauritania   | W.AF  | MON-74  | <i>Homo sapiens</i>         | Grp_VI  | LST0006 |
| L4495 | MHOM/ML/2002/CRE125    | <i>L. major</i>    | Mali         | W.AF  | MON-74  | <i>Homo sapiens</i>         | Grp_VI  | LST0006 |
| L4708 | MHOM/DZ/2003/CRE138-ER | <i>L. major</i>    | Algeria      | N. AF | MON-74  | <i>Homo sapiens</i>         | Grp_VI  | LST0006 |
| L0755 | MHOM/IL/67/JERICHOII   | <i>L. major</i>    | Israel       | M.E   | MON-26  | <i>Homo sapiens</i>         | Grp_VI  | LST0008 |
| L2699 | MHOM/SA/93/DPPE19      | <i>L. major</i>    | Saudi Arabia | M.E   | MON-26  | <i>Homo sapiens</i>         | Grp_VI  | LST0008 |
| L0062 | MHOM/YE/76/LEM62       | <i>L. major</i>    | Yemen        | M.E   | MON-26  | <i>Homo sapiens</i>         | Grp_VI  | LST0011 |
| L0466 | MHOM/IL/83/IL24        | <i>L. major</i>    | Israel       | M.E   | MON-66  | <i>Homo sapiens</i>         | Grp_VI  | LST0011 |

|       |                         |                    |              |       |         |                              |         |         |
|-------|-------------------------|--------------------|--------------|-------|---------|------------------------------|---------|---------|
| L1159 | MTAT/KE/00/T4           | <i>L. major</i>    | Kenya        | E. AF | MON-74  | <i>Tatera sp.</i>            | Grp_VI  | LST0012 |
| L1776 | MHOM/MR/89/LIPA225      | <i>L. major</i>    | Mauritania   | W.AF  | MON-117 | <i>Homo sapiens</i>          | Grp_VI  | LST0012 |
| L0129 | MRHO/SU/59/P-STRAIN     | <i>L. major</i>    | Uzbekistan   | C.A   | MON-4   | <i>Rhombomys opimus</i>      | Grp_VI  | LST0017 |
| L0131 | MHOM/SU/73/29-ASKH      | <i>L. major</i>    | Turkmenistan | C.A   | MON-26  | <i>Homo sapiens</i>          | Grp_VI  | LST0018 |
| L0146 | MMER/IN/73/GTBM         | <i>L. major</i>    | India        | I.S   | MON-23  | <i>Meriones hurrianae</i>    | Grp_VI  | LST0021 |
| L0328 | MHOM/EG/82/ALY          | <i>L. major</i>    | Egypt        | M.E   | MON-26  | <i>Homo sapiens</i>          | Grp_VI  | LST0023 |
| L0468 | MHOM/IL/83/IL32         | <i>L. major</i>    | Israel       | M.E   | MON-68  | <i>Homo sapiens</i>          | Grp_VI  | LST0028 |
| L0766 | MCAN/EG/83/ASC-D1       | <i>L. major</i>    | Egypt        | M.E   | MON-74  | <i>Canis familiaris</i>      | Grp_VI  | LST0041 |
| L0858 | MHOM/IQ/86/CRE1         | <i>L. major</i>    | Iraq         | M.E   | MON-26  | <i>Homo sapiens</i>          | Grp_VI  | LST0042 |
| L1558 | MHOM/IL/89/CRE7         | <i>L. major</i>    | Israel       | M.E   | MON-103 | <i>Homo sapiens</i>          | Grp_VI  | LST0061 |
| L2892 | MHOM/TD/92/ISS728       | <i>L. major</i>    | Chad         | C.AF  | MON-196 | <i>Homo sapiens</i>          | Grp_VI  | LST0087 |
| L3102 | MHOM/JO/90/JH39         | <i>L. major</i>    | Jordan       | M.E   | MON-26  | <i>Homo sapiens</i>          | Grp_VI  | LST0091 |
| L3147 | MHOM/IR/95/YAGHOOBIL2   | <i>L. major</i>    | Iran         | M.E   | MON-26  | <i>Homo sapiens</i>          | Grp_VI  | LST0093 |
| L3499 | MHOM/ML/97/LSL31        | <i>L. major</i>    | Mali         | W.AF  | MON-117 | <i>Homo sapiens</i>          | Grp_VI  | LST0110 |
| L3535 | MHOM/CM/97/MOK1         | <i>L. major</i>    | Cameroon     | C.AF  | MON-26  | <i>Homo sapiens</i>          | Grp_VI  | LST0111 |
| L4063 | MHOM/SN/2000/LSL50      | <i>L. major</i>    | Senegal      | W.AF  | MON-74  | <i>Homo sapiens</i>          | Grp_VI  | LST0125 |
| L4067 | MHOM/BF/2000/COU5       | <i>L. major</i>    | Burkina Faso | W.AF  | MON-74  | <i>Homo sapiens</i>          | Grp_VI  | LST0126 |
| L4148 | MHOM/NE/2001/2001/FRI01 | <i>L. major</i>    | Niger        | W.AF  | MON-74  | <i>Homo sapiens</i>          | Grp_VI  | LST0127 |
| L4613 | MHOM/SD/2003/LCB33      | <i>L. major</i>    | Sudan        | E. AF | MON-74  | <i>Homo sapiens</i>          | Grp_VI  | LST0134 |
| L4797 | MHOM/SN/2004/LCB39      | <i>L. major</i>    | Senegal      | W.AF  | MON-26  | <i>Homo sapiens</i>          | Grp_VI  | LST0136 |
| L4821 | MHOM/00/2004/LEI24      | <i>L. major</i>    | Burkina Faso | W.AF  | MON-26  | <i>Homo sapiens</i>          | Grp_VI  | LST0137 |
| L4886 | MHOM/BF/2004/REN04-8    | <i>L. major</i>    | Burkina Faso | W.AF  | MON-26  | <i>Homo sapiens</i>          | Grp_VI  | LST0138 |
| L5622 | MHOM/CF/2008/IPB1       | <i>L. major</i>    | C.A.F        | C.AF  | MON-305 | <i>Homo sapiens</i>          | Grp_VI  | LST0139 |
| L0075 | MHOM/FR/78/LEM75        | <i>L. infantum</i> | France       | S.E   | MON-1   | <i>Homo sapiens</i>          | Grp_VII | LST0001 |
| L0189 | MHOM/FR/80/LEM189       | <i>L. infantum</i> | France       | S.E   | MON-11  | <i>Homo sapiens</i>          | Grp_VII | LST0001 |
| L0236 | MHOM/IT/79/ISS7         | <i>L. infantum</i> | Italy        | S.E   | MON-27  | <i>Homo sapiens</i>          | Grp_VII | LST0001 |
| L0260 | MHOM/ES/81/LEM260       | <i>L. infantum</i> | Spain        | S.E   | MON-34  | <i>Homo sapiens</i>          | Grp_VII | LST0001 |
| L0307 | MHOM/ES/81/BCN1         | <i>L. infantum</i> | Spain        | S.E   | MON-29  | <i>Homo sapiens</i>          | Grp_VII | LST0001 |
| L0461 | MHOM/DZ/83/LIPA120      | <i>L. infantum</i> | Algeria      | N. AF | MON-34  | <i>Homo sapiens</i>          | Grp_VII | LST0001 |
| L0538 | MHOM/FR/84/LEM538       | <i>L. infantum</i> | France       | S.E   | MON-34  | <i>Homo sapiens</i>          | Grp_VII | LST0001 |
| L0622 | MHOM/CF/00/CONJUGO      | <i>L. infantum</i> | C.A.F        | C.AF  | MON-1   | <i>Homo sapiens</i>          | Grp_VII | LST0001 |
| L0666 | MNYT/CN/80/RACOONDOG    | <i>L. infantum</i> | China        | E.A   | MON-34  | <i>Nyctomys procyonoides</i> | Grp_VII | LST0001 |
| L0895 | MHOM/IT/86/ISS218       | <i>L. infantum</i> | Italy        | S.E   | MON-72  | <i>Homo sapiens</i>          | Grp_VII | LST0001 |
| L1208 | MHOM/EG/87/RTC2         | <i>L. infantum</i> | Egypt        | M.E   | MON-98  | <i>Homo sapiens</i>          | Grp_VII | LST0001 |
| L1240 | MHOM/YE/88/LEM1240      | <i>L. infantum</i> | Yemen        | M.E   | MON-1   | <i>Homo sapiens</i>          | Grp_VII | LST0001 |
| L1315 | MCAN/SN/88/LEM1315      | <i>L. infantum</i> | Senegal      | W.AF  | MON-1   | <i>Canis familiaris</i>      | Grp_VII | LST0001 |
| L1355 | IPER/FR/88/LEM1355      | <i>L. infantum</i> | France       | S.E   | MON-105 | <i>Homo sapiens</i>          | Grp_VII | LST0001 |
| L1393 | IPER/FR/88/LEM1393      | <i>L. infantum</i> | France       | S.E   | MON-77  | <i>Phlebotomus</i>           | Grp_VII | LST0001 |

|       |                        |                    |            |       |         |                         |         |         |
|-------|------------------------|--------------------|------------|-------|---------|-------------------------|---------|---------|
|       |                        |                    |            |       |         | <i>perniciosus</i>      |         |         |
| L1424 | MCAN/FR/87/RM1         | <i>L. infantum</i> | France     | S.E   | MON-108 | <i>Canis familiaris</i> | Grp_VII | LST0001 |
| L1671 | MCAN/DZ/89/LEM1671     | <i>L. infantum</i> | Algeria    | N. AF | MON-77  | <i>Canis familiaris</i> | Grp_VII | LST0001 |
| L1674 | MCAN/ES/89/BCN34       | <i>L. infantum</i> | Spain      | S.E   | MON-11  | <i>Canis familiaris</i> | Grp_VII | LST0001 |
| L2109 | MCAN/SY/90/LEM2109     | <i>L. infantum</i> | Syria      | M.E   | MON-1   | <i>Canis familiaris</i> | Grp_VII | LST0001 |
| L2205 | MHOM/ES/90/BCN61       | <i>L. infantum</i> | Spain      | S.E   | MON-28  | <i>Homo sapiens</i>     | Grp_VII | LST0001 |
| L2289 | MHOM/GR/90/LA1037      | <i>L. infantum</i> | Greece     | S.E   | MON-1   | <i>Homo sapiens</i>     | Grp_VII | LST0001 |
| L2298 | MHOM/ES/91/LEM2298     | <i>L. infantum</i> | Spain      | S.E   | MON-183 | <i>Homo sapiens</i>     | Grp_VII | LST0001 |
| L2479 | MHOM/FR/88/LPMA74ER    | <i>L. infantum</i> | France     | S.E   | MON-186 | <i>Homo sapiens</i>     | Grp_VII | LST0001 |
| L2629 | MCAN/MA/93/LEM2629     | <i>L. infantum</i> | Morocco    | N. AF | MON-1   | <i>Canis familiaris</i> | Grp_VII | LST0001 |
| L2791 | MHOM/IT/93/ISS833      | <i>L. infantum</i> | Italy      | S.E   | MON-190 | <i>Homo sapiens</i>     | Grp_VII | LST0001 |
| L2813 | MHOM/TR/94/LPN101      | <i>L. infantum</i> | Turkey     | M.E   | MON-1   | <i>Homo sapiens</i>     | Grp_VII | LST0001 |
| L2844 | MHOM/PT/94/IMT202      | <i>L. infantum</i> | Portugal   | S.E   | MON-29  | <i>Homo sapiens</i>     | Grp_VII | LST0001 |
| L3161 | MCAN/IR/94/MOHEBL1     | <i>L. infantum</i> | Iran       | M.E   | MON-1   | <i>Canis familiaris</i> | Grp_VII | LST0001 |
| L3338 | MHOM/ES/97/LGE1        | <i>L. infantum</i> | Spain      | S.E   | MON-1   | <i>Homo sapiens</i>     | Grp_VII | LST0001 |
| L3346 | MHOM/IT/97/LPN149      | <i>L. infantum</i> | Italy      | S.E   | MON-1   | <i>Homo sapiens</i>     | Grp_VII | LST0001 |
| L3357 | MCAN/ /..LV755         | <i>L. infantum</i> | U.K        | W.E   | MON-1   | <i>Canis familiaris</i> | Grp_VII | LST0001 |
| L3386 | MCAN/IL/97/LRC-L720    | <i>L. infantum</i> | Israel     | M.E   | MON-1   | <i>Canis familiaris</i> | Grp_VII | LST0001 |
| L3519 | MHOM/PT/98/IMT238      | <i>L. infantum</i> | Portugal   | S.E   | MON-80  | <i>Homo sapiens</i>     | Grp_VII | LST0001 |
| L3546 | MHOM/DL/98/LUB1        | <i>L. infantum</i> | Germany    | W.E   | MON-1   | <i>Homo sapiens</i>     | Grp_VII | LST0001 |
| L3637 | MHOM/ES/97/LLM719      | <i>L. infantum</i> | Spain      | S.E   | MON-253 | <i>Homo sapiens</i>     | Grp_VII | LST0001 |
| L3675 | MHOM/TN/98/20MO        | <i>L. infantum</i> | Tunisia    | N. AF | MON-1   | <i>Homo sapiens</i>     | Grp_VII | LST0001 |
| L3895 | MCAN/AL/98/C78L574a    | <i>L. infantum</i> | Albania    | S.E   | MON-1   | <i>Canis familiaris</i> | Grp_VII | LST0001 |
| L3940 | MCAN/PT/99/BOBI        | <i>L. infantum</i> | Portugal   | S.E   | MON-98  | <i>Canis familiaris</i> | Grp_VII | LST0001 |
| L3962 | MHOM/AL/2000/516LEZH   | <i>L. infantum</i> | Albania    | S.E   | MON-1   | <i>Homo sapiens</i>     | Grp_VII | LST0001 |
| L4224 | MHOM/ES/2000/LLM938    | <i>L. infantum</i> | Spain      | S.E   | MON-282 | <i>Homo sapiens</i>     | Grp_VII | LST0001 |
| L4228 | MHOM/ES/97/LLM615      | <i>L. infantum</i> | Spain      | S.E   | MON-285 | <i>Homo sapiens</i>     | Grp_VII | LST0001 |
| L4610 | MHOM/PT/2001/IMT266B   | <i>L. infantum</i> | Portugal   | S.E   | MON-1   | <i>Homo sapiens</i>     | Grp_VII | LST0001 |
| L4650 | MHOM/FR/2003/LPN221    | <i>L. infantum</i> | France     | S.E   | MON-1   | <i>Homo sapiens</i>     | Grp_VII | LST0001 |
| L4749 | MHOM/FR/2004/LPN228    | <i>L. infantum</i> | France     | S.E   | MON-1   | <i>Homo sapiens</i>     | Grp_VII | LST0001 |
| L4826 | MHOM/FR/2004/LPN236    | <i>L. infantum</i> | France     | S.E   | MON-1   | <i>Homo sapiens</i>     | Grp_VII | LST0001 |
| L4838 | MHOM/FR/2004/LPN235    | <i>L. infantum</i> | France     | S.E   | MON-1   | <i>Homo sapiens</i>     | Grp_VII | LST0001 |
| L4840 | MHOM/FR/2004/LPN237    | <i>L. infantum</i> | France     | S.E   | MON-1   | <i>Homo sapiens</i>     | Grp_VII | LST0001 |
| L5425 | MHOM/IL/2006/LRC-L1296 | <i>L. infantum</i> | Israel     | M.E   | MON-1   | <i>Homo sapiens</i>     | Grp_VII | LST0001 |
| L5426 | MHOM/IL/2006/LRC-L1300 | <i>L. infantum</i> | Israel     | M.E   | MON-1   | <i>Homo sapiens</i>     | Grp_VII | LST0001 |
| L5427 | MHOM/IL/2007/LRC-L1303 | <i>L. infantum</i> | Israel     | M.E   | MON-1   | <i>Homo sapiens</i>     | Grp_VII | LST0001 |
| L5542 | MCAN/UZ/2007/LRC-L1313 | <i>L. infantum</i> | Uzbekistan | C.A   | MON-1   | <i>Canis familiaris</i> | Grp_VII | LST0001 |
| L5695 | MCAN/DZ/2008/ENV48     | <i>L. infantum</i> | Algeria    | N. AF | MON-281 | <i>Canis familiaris</i> | Grp_VII | LST0001 |

|       |                       |                      |          |       |         |                            |         |         |
|-------|-----------------------|----------------------|----------|-------|---------|----------------------------|---------|---------|
| L0991 | MHOM/LB/84/SALTI1     | <i>L. archibaldi</i> | Lebanon  | M.E   | MON-82  | <i>Homo sapiens</i>        | Grp_VII | LST0003 |
| L0995 | MHOM/LB/84/SALTI3     | <i>L. archibaldi</i> | Lebanon  | M.E   | MON-82  | <i>Homo sapiens</i>        | Grp_VII | LST0003 |
| L1070 | MHOM/IN/00/LRC-L51    | <i>L. donovani</i>   | India    | I.S   | MON-18  | <i>Homo sapiens</i>        | Grp_VII | LST0003 |
| L1825 | MHOM/KE/89/EB59       | <i>L. archibaldi</i> | Kenya    | E. AF | MON-82  | <i>Homo sapiens</i>        | Grp_VII | LST0003 |
| L1859 | MHOM/TN/00/TUNIS      | <i>L. archibaldi</i> | Tunisia  | N. AF | MON-82  | <i>Homo sapiens</i>        | Grp_VII | LST0003 |
| L2431 | MHOM/PT/92/IMT180     | <i>L. donovani</i>   | Portugal | S.E   | MON-18  | <i>Homo sapiens</i>        | Grp_VII | LST0003 |
| L3588 | MHOM/ES/98/DPPE28     | <i>L. infantum</i>   | Spain    | S.E   | MON-24  | <i>Homo sapiens</i>        | Grp_VII | LST0004 |
| L4616 | MHOM/MA/2003/TIM10    | <i>L. infantum</i>   | Morocco  | N. AF | MON-29  | <i>Homo sapiens</i>        | Grp_VII | LST0004 |
| L5110 | MHOM/ES/96/LLM-558    | <i>L. infantum</i>   | Spain    | S.E   | MON-302 | <i>Homo sapiens</i>        | Grp_VII | LST0004 |
| L0356 | MHOM/FR/82/LEM356     | <i>L. infantum</i>   | France   | S.E   | MON-33  | <i>Homo sapiens</i>        | Grp_VII | LST0007 |
| L2893 | MHOM/ES/88/LLM175     | <i>L. infantum</i>   | Spain    | S.E   | MON-198 | <i>Homo sapiens</i>        | Grp_VII | LST0007 |
| L4929 | MHOM/FR/2005/LPN253   | <i>L. infantum</i>   | France   | S.E   | MON-80  | <i>Homo sapiens</i>        | Grp_VII | LST0007 |
| L1242 | MHOM/YE/88/LEM1242    | <i>L. donovani</i>   | Yemen    | M.E   | MON-31  | <i>Homo sapiens</i>        | Grp_VII | LST0010 |
| L1863 | MHOM/IN/61/L13        | <i>L. donovani</i>   | India    | I.S   | MON-31  | <i>Homo sapiens</i>        | Grp_VII | LST0010 |
| L0980 | MHOM/ET/84/ADDIS164   | <i>L. donovani</i>   | Ethiopia | E. AF | MON-83  | <i>Homo sapiens</i>        | Grp_VII | LST0013 |
| L4272 | MHOM/SD/87/UGX-MARROW | <i>L. donovani</i>   | Sudan    | E. AF | MON-31  | <i>Homo sapiens</i>        | Grp_VII | LST0013 |
| L0358 | MHOM/IN/54/SC23       | <i>L. donovani</i>   | India    | I.S   | MON-38  | <i>Homo sapiens</i>        | Grp_VII | LST0014 |
| L0707 | MHOM/KE/55/LRC-L53    | <i>L. donovani</i>   | Kenya    | E. AF | MON-36  | <i>Homo sapiens</i>        | Grp_VII | LST0014 |
| L2388 | IMRT/ET/90/TESHOME210 | <i>L. donovani</i>   | Ethiopia | E. AF | MON-37  | <i>Phlebotomus martini</i> | Grp_VII | LST0015 |
| L4273 | MHOM/KE/73/MRC74      | <i>L. donovani</i>   | Kenya    | E. AF | MON-2   | <i>Homo sapiens</i>        | Grp_VII | LST0015 |
| L0138 | MHOM/IN/00/DEVI       | <i>L. donovani</i>   | India    | I.S   | MON-2   | <i>Homo sapiens</i>        | Grp_VII | LST0019 |
| L0232 | MCAN/IT/76/ISS2       | <i>L. archibaldi</i> | Italy    | S.E   | MON-82  | <i>Canis familiaris</i>    | Grp_VII | LST0022 |
| L0417 | MHOM/DZ/82/LIPA59     | <i>L. infantum</i>   | Algeria  | N. AF | MON-24  | <i>Homo sapiens</i>        | Grp_VII | LST0024 |
| L0425 | MHOM/DZ/83/LEM425     | <i>L. infantum</i>   | Algeria  | N. AF | MON-80  | <i>Homo sapiens</i>        | Grp_VII | LST0026 |
| L0494 | MHOM/SD/82/GILANI     | <i>L. infantum</i>   | Sudan    | E. AF | MON-30  | <i>Homo sapiens</i>        | Grp_VII | LST0029 |
| L0659 | MHOM/GR/00/LEM659     | <i>L. infantum</i>   | Greece   | S.E   | MON-80  | <i>Homo sapiens</i>        | Grp_VII | LST0036 |
| L0668 | MHOM/CN/00/WANGJIE-1  | <i>L. donovani</i>   | China    | E.A   | MON-35  | <i>Homo sapiens</i>        | Grp_VII | LST0037 |
| L0698 | MHOM/ET/67/HU3        | <i>L. donovani</i>   | Ethiopia | E. AF | MON-18  | <i>Homo sapiens</i>        | Grp_VII | LST0038 |
| L0719 | IMRT/KE/62/LRC-L57    | <i>L. donovani</i>   | Kenya    | E. AF | MON-37  | <i>Phlebotomus martini</i> | Grp_VII | LST0039 |
| L0890 | MHOM/SD/66/L46        | <i>L. infantum</i>   | Sudan    | E. AF | MON-30  | <i>Homo sapiens</i>        | Grp_VII | LST0040 |
| L0935 | MCAN/ES/86/LEM935     | <i>L. infantum</i>   | Spain    | S.E   | MON-77  | <i>Homo sapiens</i>        | Grp_VII | LST0043 |
| L0946 | MHOM/SU/84/MARZ-KRIM  | <i>L. donovani</i>   | Ukraine  | E.E   | MON-73  | <i>Homo sapiens</i>        | Grp_VII | LST0044 |
| L1005 | MHOM/ET/72/GEBRE1     | <i>L. archibaldi</i> | Ethiopia | E. AF | MON-82  | <i>Homo sapiens</i>        | Grp_VII | LST0046 |
| L1014 | MHOM/ET/84/ADDIS135   | <i>L. donovani</i>   | Ethiopia | E. AF | MON-32  | <i>Homo sapiens</i>        | Grp_VII | LST0047 |
| L1019 | MHOM/ET/82/BEKELE     | <i>L. donovani</i>   | Ethiopia | E. AF | MON-31  | <i>Homo sapiens</i>        | Grp_VII | LST0049 |
| L1043 | MHOM/MT/85/BUCK       | <i>L. infantum</i>   | Malta    | S.E   | MON-78  | <i>Homo sapiens</i>        | Grp_VII | LST0050 |
| L1153 | MHOM/SD/62/3S         | <i>L. infantum</i>   | Sudan    | E. AF | MON-81  | <i>Homo sapiens</i>        | Grp_VII | LST0055 |
| L1154 | MHOM/SD/00/DH177      | <i>L. infantum</i>   | Sudan    | E. AF | MON-81  | <i>Homo sapiens</i>        | Grp_VII | LST0056 |

|       |                      |                      |              |       |         |                              |         |         |
|-------|----------------------|----------------------|--------------|-------|---------|------------------------------|---------|---------|
| L1560 | MHOM/ES/89/BCN32     | <i>L. infantum</i>   | Spain        | S.E   | MON-33  | <i>Homo sapiens</i>          | Grp_VII | LST0062 |
| L1733 | MHOM/IT/85/ISS175    | <i>L. infantum</i>   | Italy        | S.E   | MON-111 | <i>Homo sapiens</i>          | Grp_VII | LST0066 |
| L1764 | IARI/PT/89/IMT171    | <i>L. infantum</i>   | Portugal     | S.E   | MON-24  | <i>Phlebotomus ariasi</i>    | Grp_VII | LST0067 |
| L2141 | IALE/CN/88/Turfan10  | <i>L. donovani</i>   | China        | E.A   | MON-138 | <i>Phlebotomus alexandri</i> | Grp_VII | LST0072 |
| L2180 | MHOM/IT/90/ISS510    | <i>L. infantum</i>   | Italy        | S.E   | MON-136 | <i>Homo sapiens</i>          | Grp_VII | LST0073 |
| L2455 | MHOM/MA/92/LEM2455   | <i>L. infantum</i>   | Morocco      | N. AF | MON-24  | <i>Homo sapiens</i>          | Grp_VII | LST0078 |
| L2481 | MHOM/IT/91/ISS666    | <i>L. infantum</i>   | Italy        | S.E   | MON-185 | <i>Homo sapiens</i>          | Grp_VII | LST0079 |
| L2506 | MHOM/DZ/92/CRE21     | <i>L. infantum</i>   | Algeria      | N. AF | MON-78  | <i>Homo sapiens</i>          | Grp_VII | LST0080 |
| L2677 | MHOM/YE/93/LEM2677   | <i>L. donovani</i>   | Yemen        | M.E   | MON-191 | <i>Homo sapiens</i>          | Grp_VII | LST0081 |
| L2793 | MHOM/IT/93/ISS800    | <i>L. infantum</i>   | Italy        | S.E   | MON-188 | <i>Homo sapiens</i>          | Grp_VII | LST0082 |
| L2794 | MHOM/IT/93/ISS822    | <i>L. infantum</i>   | Italy        | S.E   | MON-201 | <i>Homo sapiens</i>          | Grp_VII | LST0083 |
| L2795 | MHOM/IT/92/ISS683    | <i>L. infantum</i>   | Italy        | S.E   | MON-187 | <i>Homo sapiens</i>          | Grp_VII | LST0084 |
| L2884 | MHOM/DZ/94/CRE64     | <i>L. infantum</i>   | Algeria      | N. AF | MON-33  | <i>Homo sapiens</i>          | Grp_VII | LST0086 |
| L2894 | MHOM/ES/92/LLM373    | <i>L. infantum</i>   | Spain        | S.E   | MON-199 | <i>Homo sapiens</i>          | Grp_VII | LST0088 |
| L2975 | MHOM/MA/95/CRE72     | <i>L. donovani</i>   | Morocco      | N. AF | MON-37  | <i>Homo sapiens</i>          | Grp_VII | LST0089 |
| L3079 | MHOM/SA/91/WR1063    | <i>L. donovani</i>   | Saudi Arabia | M.E   | MON-18  | <i>Homo sapiens</i>          | Grp_VII | LST0090 |
| L3141 | MHOM/FR/95/LEM3141   | <i>L. infantum</i>   | France       | S.E   | MON-28  | <i>Homo sapiens</i>          | Grp_VII | LST0092 |
| L3437 | MHOM/IT/95/GIIPcos   | <i>L. infantum</i>   | Italy        | S.E   | MON-29  | <i>Homo sapiens</i>          | Grp_VII | LST0107 |
| L3443 | MHOM/SD/97/LEM3443   | <i>L. archibaldi</i> | Sudan        | E. AF | MON-257 | <i>Homo sapiens</i>          | Grp_VII | LST0108 |
| L3463 | MHOM/SD/97/LEM3463   | <i>L. archibaldi</i> | Sudan        | E. AF | MON-258 | <i>Homo sapiens</i>          | Grp_VII | LST0109 |
| L3538 | MHOM/FR/97/LPM 178a  | <i>L. infantum</i>   | France       | S.E   | MON-30  | <i>Homo sapiens</i>          | Grp_VII | LST0112 |
| L3787 | MCAN/SD/99/LEM3787   | <i>L. archibaldi</i> | Sudan        | E. AF | MON-82  | <i>Canis familiaris</i>      | Grp_VII | LST0113 |
| L3793 | MHOM/SD/99/LEM3793   | <i>L. donovani</i>   | Sudan        | E. AF | MON-276 | <i>Homo sapiens</i>          | Grp_VII | LST0114 |
| L3941 | MCAN/SD/2000/LEM3941 | <i>L. infantum</i>   | Sudan        | E. AF | MON-278 | <i>Canis familiaris</i>      | Grp_VII | LST0116 |
| L3942 | MCAN/SD/2000/LEM3942 | <i>L. donovani</i>   | Sudan        | E. AF | MON-277 | <i>Canis familiaris</i>      | Grp_VII | LST0117 |
| L3968 | MHOM/TN/99/105 S     | <i>L. infantum</i>   | Tunisia      | N. AF | MON-80  | <i>Homo sapiens</i>          | Grp_VII | LST0119 |
| L3976 | MHOM/PT/2000/IMT261  | <i>L. infantum</i>   | Portugal     | S.E   | MON-1   | <i>Homo sapiens</i>          | Grp_VII | LST0120 |
| L3988 | MCAN/SD/2000/LEM3988 | <i>L. infantum</i>   | Sudan        | E. AF | MON-267 | <i>Canis familiaris</i>      | Grp_VII | LST0122 |
| L4043 | MHOM/IL/79/LANSBERG  | <i>L. donovani</i>   | Israel       | M.E   | MON-280 | <i>Homo sapiens</i>          | Grp_VII | LST0123 |
| L4046 | MHOM/IL/87/BENAMI    | <i>L. donovani</i>   | Israel       | M.E   | MON-37  | <i>Homo sapiens</i>          | Grp_VII | LST0124 |
| L4223 | MHOM/ES/95/LLM480    | <i>L. infantum</i>   | Spain        | S.E   | MON-228 | <i>Homo sapiens</i>          | Grp_VII | LST0128 |
| L4227 | MHOM/ES/99/LLM855    | <i>L. infantum</i>   | Spain        | S.E   | MON-284 | <i>Homo sapiens</i>          | Grp_VII | LST0129 |
| L4319 | MHOM/SD/2001/AHSAF11 | <i>L. donovani</i>   | Sudan        | E. AF | MON-18  | <i>Homo sapiens</i>          | Grp_VII | LST0130 |
| L4392 | MHOM/TN/2002/LC38    | <i>L. infantum</i>   | Tunisia      | N. AF | MON-24  | <i>Homo sapiens</i>          | Grp_VII | LST0131 |
| L4474 | MHOM/LK/2002/L80     | <i>L. donovani</i>   | Sri Lanka    | I.S   | MON-37  | <i>Homo sapiens</i>          | Grp_VII | LST0132 |
| L4537 | MHOM/IN/2003/LEM4537 | <i>L. donovani</i>   | India        | I.S   | MON-37  | <i>Homo sapiens</i>          | Grp_VII | LST0133 |
| L4701 | MHOM/GR/2003/GH15    | <i>L. infantum</i>   | Greece       | S.E   | MON-98  | <i>Homo sapiens</i>          | Grp_VII | LST0135 |
| L5751 | MHOM/TR/2005/CUK1    | <i>L. donovani</i>   | Turkey       | M.E   | MON-309 | <i>Homo sapiens</i>          | Grp_VII | LST0140 |

|              |                     |                        |               |     |         |                     |    |    |
|--------------|---------------------|------------------------|---------------|-----|---------|---------------------|----|----|
| <b>L2208</b> | MHOM/BR/81/M6426    | <i>L. lainsoni</i>     | Brazil        | S.A | MON-149 | <i>Homo sapiens</i> | ND | ND |
| <b>L2700</b> | MHOM/BO/90/AN       | <i>L. braziliensis</i> | Bolivia       | S.A | MON-214 | <i>Homo sapiens</i> | ND | ND |
| <b>L4762</b> | MHOM/GF/2004/LAV014 | <i>L. guyanensis</i>   | French Guiana | S.A | MON-45  | <i>Homo sapiens</i> | ND | ND |

C.A.F, Central African Republic; U.K, United Kingdom.

C.A, Central Asia; C.AF, Central Africa; E.A, Eastern Asia; E.AF, Eastern Africa; E.E, Eastern Europe; I.S, Indian Subcontinent; M.E, Middle East; N.AF, Northern Africa; S.E, Southern Europe; W.A, Western Asia; W.AF, Western Africa; W.E, Western Europe, S.A, Southern America.

LST: *Leishmania* sequence type

ND: Not determined
