# Supplementary material for: Genetic Structure and Evolution of the Leishmania Genus in Africa and Eurasia: What Does MLSA Tell Us
Source: PubMed Central journal article supplement (PMC3681676; doi:10.1371/journal.pntd.0002255), 2013-06-13
Supplement: pntd.0002255.s010.pdf [file pntd.0002255.s010.pdf]

Table S2. Statistical assessment of the congruence between the Maximum Likelihood (ML) and Bayesian tree topologies.

| <b>Tree of the concatenated nucleotides</b> | <b>-ln L<sup>a</sup></b> | <b>Diff -ln L<sup>b</sup></b> | <b>p-value</b> |
|---------------------------------------------|--------------------------|-------------------------------|----------------|
| ML tree topology                            | 29555.84144              |                               |                |
| Bayesian tree topology                      | 29607.08844              | 51.24700                      | 0.65           |
