# Supplementary material for: Genetic Structure and Evolution of the Leishmania Genus in Africa and Eurasia: What Does MLSA Tell Us
Source: PubMed Central journal article supplement (PMC3681676; doi:10.1371/journal.pntd.0002255), 2013-06-13
Supplement: pntd.0002255.s012.pdf [file pntd.0002255.s012.pdf]

Table S4. Statistical assessment of the congruence between the MLSA and MLEE datasets.

| <b>NJ tree topology</b>   | <b>-ln L<sup>a</sup></b> | <b>Diff -ln L<sup>b</sup></b> | <b>P-value</b> |
|---------------------------|--------------------------|-------------------------------|----------------|
| Concatenated nt (MLSA)    | 22989.74334              | (best)                        |                |
| Iso-enzymatic data (MLEE) | 25030.88926              | 2041.14592                    | <b>0.16</b>    |
