# Supplementary material for: Genetic Structure and Evolution of the Leishmania Genus in Africa and Eurasia: What Does MLSA Tell Us
Source: PubMed Central journal article supplement (PMC3681676; doi:10.1371/journal.pntd.0002255), 2013-06-13
Supplement: pntd.0002255.s013.pdf [file pntd.0002255.s013.pdf]

Table S5. Statistical assessment of the congruence between individual MLSA clusters and MLEE groups.

| <b>NJ tree topology</b> | <b>-ln L<sup>a</sup></b> | <b>Diff -ln L<sup>b</sup></b> | <b>P-value</b> |
|-------------------------|--------------------------|-------------------------------|----------------|
| Group I MLSA            | 13355.48940              |                               |                |
| Group I MLEE            | 13491.05094              | 135.56154                     | 0.00*          |
| Group II MLSA           | 14714.18758              |                               |                |
| Group II MLEE           | 14806.36916              | 1184.11436                    | <b>0.28</b>    |
| Group VI MLSA           | 13399.80026              |                               |                |
| Group VI MLEE           | 13610.39187              | 210.59161                     | 0.00*          |
| Group VII MLSA          | 14725.60965              |                               |                |
| Group VII MLEE          | 15324.29407              | 598.68442                     | 0.00*          |

\* P < 0.05
